# Supplementary material
Source: PubMed Central journal article supplement (PMC4587324)
Supplement: supp_M114.047787_mcp.M114.047787-3.pdf [file supp_M114.047787_mcp.M114.047787-3.pdf]

**Supplemental Table 2 - Comparison of # unique peptides used for protein identifications in Mascot from searches with different enzyme specificities. All other search parameters were identical.**

| Accession # | Gene Name | Protein Name                               | Enzyme Specificity |              |              |
|-------------|-----------|--------------------------------------------|--------------------|--------------|--------------|
|             |           |                                            | Fully-tryptic      | Semi-tryptic | Non-specific |
| P02453      | COL1A1    | Collagen alpha-1(I) chain                  | 103                | 760          | 1021         |
| P02465      | COL1A2    | Collagen alpha-2(I) chain                  | 100                | 655          | 852          |
| P02459      | COL2A1    | Collagen alpha-1(II) chain                 | 81                 | 420          | 597          |
| P04258      | COL3A1    | Collagen alpha-1(III) chain                | 76                 | 371          | 570          |
| G3MZI7      | COL5A1    | Collagen alpha-1(V) chain                  | 66                 | 249          | 412          |
| F1N2Y2      | COL5A2    | Collagen alpha-2(V) chain                  | 58                 | 222          | 378          |
| E1BI98      | COL6A1    | Collagen alpha-1(VI) chain                 | 19                 | 46           | 46           |
| F1N401      | COL12A1   | Collagen alpha-1(XII) chain                | 18                 | 77           | 94           |
| E1BG60      | COL22A1   | Collagen alpha-1(XXII) chain               | 47                 | 195          | 343          |
| P55252      | HAPLN1    | Hyaluronan and proteoglycan link protein 1 | 0                  | 6            | 6            |
| P02820      | BGLAP     | Osteocalcin                                | 1                  | 7            | 6            |
